# Supplementary material
Source: HighWire-hosted journal article supplement (https://www.rcpjournals.org/highwire/filestream/7998/field_highwire_adjunct_files/0/S1_-_The_FORWARD_bundle.pdf)
Supplement: S1_-_The_FORWARD_bundle.pdf [file S1_-_The_FORWARD_bundle.pdf]

# THE FORWARD BUNDLE

Patient label

Date:  
Time:

## Feeding via the Oral Route With Acknowledged Risk of Deterioration

### Stage 1 : Identification — Is the patient for FORWARD?

|                |                                                                                                                                                                                                                                                                                                                               |                              |                             |
|----------------|-------------------------------------------------------------------------------------------------------------------------------------------------------------------------------------------------------------------------------------------------------------------------------------------------------------------------------|------------------------------|-----------------------------|
| Identification | <p>The patient has an unsafe swallow which is not likely to improve<br/><i>This assessment is usually made by a speech and language therapist (SLT) but may be made by a consultant physician</i></p>                                                                                                                         | Yes <input type="checkbox"/> | No <input type="checkbox"/> |
|                | <p>The multidisciplinary team (MDT) have made the decision the patient is not / no longer appropriate for tube feeding<br/><b>OR</b><br/>The patient is choosing not to have a feeding tube<br/><b>OR</b><br/>The patient is already tube fed long term but requests or requires small amounts of oral intake for comfort</p> | Yes <input type="checkbox"/> | No <input type="checkbox"/> |

If **YES** to both, proceed to decision making

### Stage 2 : Decision making

|                 |                                                                                                                                                                                                                                                                                                                                                     |                              |                             |
|-----------------|-----------------------------------------------------------------------------------------------------------------------------------------------------------------------------------------------------------------------------------------------------------------------------------------------------------------------------------------------------|------------------------------|-----------------------------|
| Decision making | <p>Establish possible feeding recommendations that balance risks, burdens and benefits to the patient<br/><i>These are usually determined by an SLT but may be determined by a consultant physician (+/- SLT referral to support patient and family)</i></p>                                                                                        |                              |                             |
|                 | <p>Patient's capacity to consent to these recommendations is assessed and documented</p>                                                                                                                                                                                                                                                            |                              |                             |
|                 | <p>The patient has capacity and after discussion, has made an informed decision to eat and drink with acknowledged risk of deterioration</p> <p><b>OR</b></p> <p>The patient lacks capacity, but a best interests MDT discussion has taken place that has concluded that he or she should eat and drink with acknowledged risk of deterioration</p> | Yes <input type="checkbox"/> | No <input type="checkbox"/> |

If **YES** to either question proceed to implementation

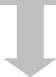

## Stage 3 : Implementation and communication

Implementation

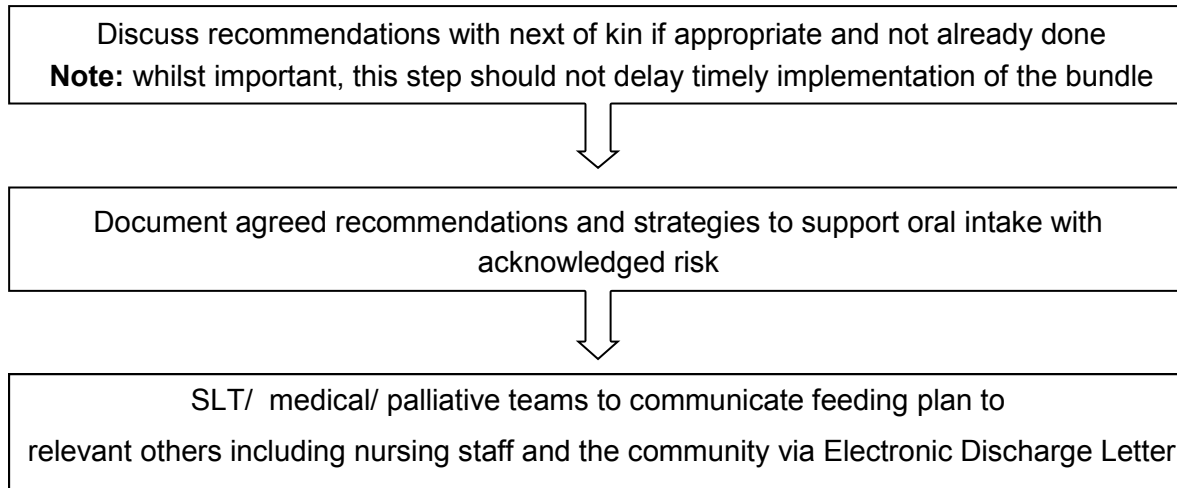

## Stage 4: Escalation planning

Escalation Planning

Medical team to document suggested management strategies in the event of deterioration, e.g. chest physiotherapy; parenteral fluids; antibiotics; symptom control measures

|                                                                                  |                                 |                                |
|----------------------------------------------------------------------------------|---------------------------------|--------------------------------|
| Has there been documentation of any ceiling of care? (e.g. ward based care only) | Yes<br><input type="checkbox"/> | No<br><input type="checkbox"/> |
| Has a DNAR decision been documented?                                             | Yes<br><input type="checkbox"/> | No<br><input type="checkbox"/> |
| Has the AMBER care bundle been considered?                                       | Yes<br><input type="checkbox"/> | No<br><input type="checkbox"/> |
| Has a PEACE document been considered?                                            | Yes<br><input type="checkbox"/> | No<br><input type="checkbox"/> |

### Reconsider FORWARD if;

Risks, benefits or burdens change

**FORWARD bundle form is completed and filed in medical notes by the managing team.**

Name of responsible consultant .....

Signed by SLT (if applicable) ..... Date .....

Signed by Doctor ..... Date .....
